# Supplementary material for: Kindlin-1 Regulates Keratinocyte Electrotaxis
Source: PubMed Central journal article supplement (PMC5756539; doi:10.1016/j.jid.2016.05.129), 2016-11
Supplement: mmc1.pdf [file mmc1.pdf]

S1

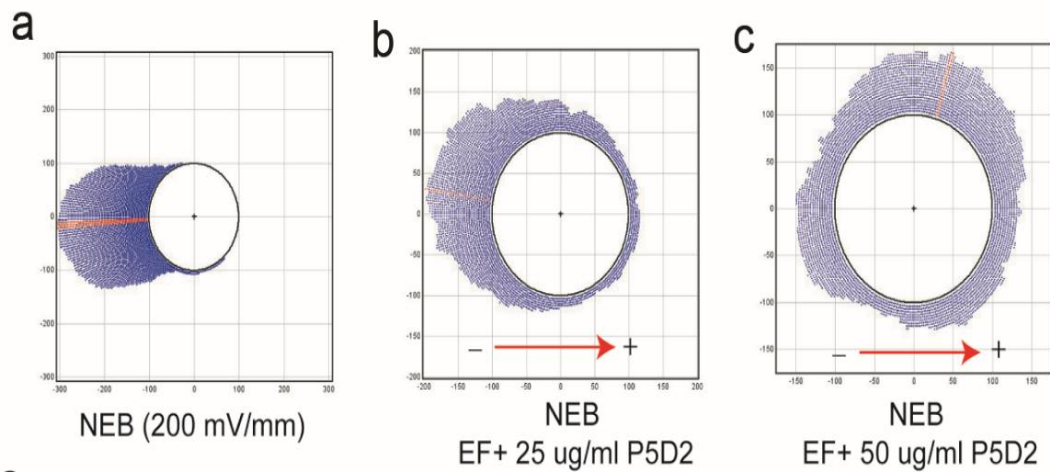

**Supplementary Figure S1.** (a-c) The electotaxis of NHK cells with control IgG (a), 25  $\mu\text{g/ml}$  (b) and 50  $\mu\text{g/ml}$  (c) were analysed by using circular graphs. x and y-axis give distance in  $\mu\text{m}$ . EF vector is horizontal with cathode to the left.
